# Supplementary material for: Metal–organic framework (UiO-66 and UiO-66-NH2)-based adsorbents for bilirubin removal used in hemoperfusion
Source: Royal Society of Chemistry journal article supplement (doi:10.1039/d3ra07212f), 2023-01-01
Supplement: d3ra07212f1.pdf [file d3ra07212f1.pdf]

## Metal Organic Framework UiO-66 and UiO-66-NH<sub>2</sub> Based Adsorbents for Bilirubin Removal Used in Hemoperfusion

Yi Liu<sup>1</sup>, Zhipeng Yuan<sup>2,\*</sup>, Yanrong Chen<sup>3,\*</sup>

1. Department of traditional Chinese medicine, Jinan Fourth People's Hospital, Jinan, Shandong, PR China.

2. Shandong Key Laboratory for Special Silicon-containing Material, Advanced Materials Institute, Qilu University of Technology (Shandong Academy of Sciences), Jinan, Shandong, PR China.

3. The Affiliated hospital of Shandong university Of traditional chinese medicine, Jinan, Shandong, PR China.

\* for corresponding author.

E-mail address: yuanzp@sdas.org    xiaopang-kk@163.com

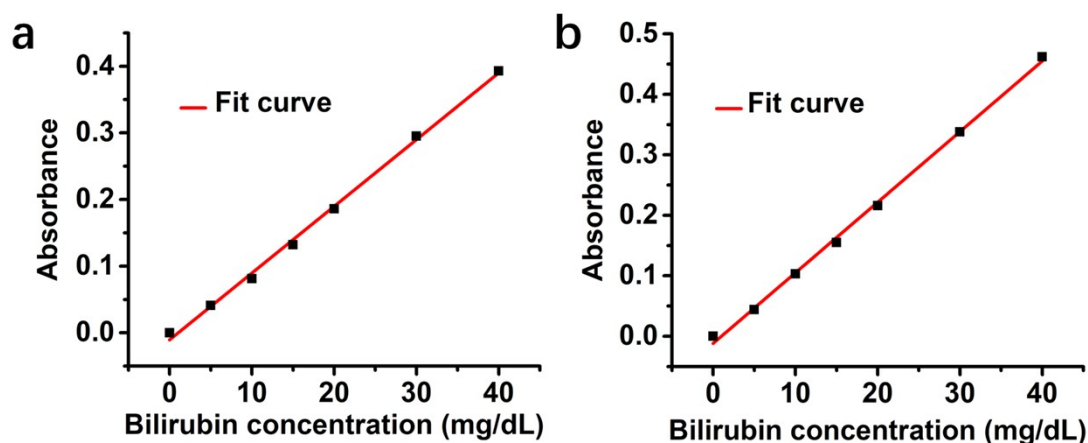

Figure S1 (a) Absorbance at 438 nm of bilirubin aqueous solution with different concentrations and its linear fitting standard curve. (b) Absorbance at 452 nm of bilirubin loaded BSA solution and its linear fitting standard curve. with different bilirubin concentrations.

**Table S1 equilibrium adsorption capacity at different initial concentrations of bilirubin in aqueous solution**

| Samples                      | Initial concentration of bilirubin in aqueous solution |          |          |          |          |          |
|------------------------------|--------------------------------------------------------|----------|----------|----------|----------|----------|
|                              | 5 mg/dL                                                | 10 mg/dL | 15 mg/dL | 20 mg/dL | 30 mg/dL | 40 mg/dL |
| UiO-66-NH <sub>2</sub> -1    | 10.4923                                                | 19.8403  | 30.1863  | 42.5283  | 71.2043  | 102.5416 |
| UiO-66-NH <sub>2</sub> -1.45 | 10.4923                                                | 24.4977  | 35.5090  | 45.5223  | 75.1963  | 104.5376 |
| UiO-66-NH <sub>2</sub> -1.9  | 10.8250                                                | 26.1610  | 39.5010  | 51.8430  | 80.1863  | 110.8583 |

|          |         |         |         |         |         |          |
|----------|---------|---------|---------|---------|---------|----------|
| UiO-66-1 | 11.1577 | 27.4917 | 43.4930 | 59.8270 | 91.8297 | 124.4977 |
|----------|---------|---------|---------|---------|---------|----------|

**Table S2 equilibrium adsorption capacity at different initial concentrations of bilirubin in plasma**

| Samples                      | Initial concentration of bilirubin in plasma |          |          |          |          |          |
|------------------------------|----------------------------------------------|----------|----------|----------|----------|----------|
|                              | 5 mg/dL                                      | 10 mg/dL | 15 mg/dL | 20 mg/dL | 30 mg/dL | 40 mg/dL |
| UiO-66-NH <sub>2</sub> -1    | 6.3203                                       | 12.3977  | 18.1328  | 23.6203  | 33.2467  | 41.7109  |
| UiO-66-NH <sub>2</sub> -1.45 | 10.2915                                      | 20.3236  | 30.0175  | 39.0408  | 56.7236  | 71.9517  |
| UiO-66-NH <sub>2</sub> -1.9  | 11.3021                                      | 22.1952  | 32.7536  | 42.9792  | 63.1139  | 81.1282  |
| UiO-66-1                     | 9.1811                                       | 18.1514  | 26.9275  | 35.5877  | 52.7448  | 69.0840  |
